# Supplementary material
Source: MDPI journal article supplement (https://www.mdpi.com/2311-5637/9/4/331)
Supplement: s1 [file s1]

**Supplementary Table S2.** Principal Component Analysis of silage variables: correlations between the Principal Components and the original variables.

| Variables   | CP 1  | CP 2  |
|-------------|-------|-------|
| pH          | -0,44 | -0,24 |
| LAB         | 0,15  | 0,52  |
| TMB         | 0,44  | 0,44  |
| Yeast       | 0,03  | 0,42  |
| RSs         | -0,3  | -0,49 |
| N-NH3       | 0,02  | 0,42  |
| Lactate     | -0,06 | 0,68  |
| Acetate     | -0,79 | 0,27  |
| L:A         | 0,87  | 0,03  |
| Ethanol     | 0,05  | 0,46  |
| Total acids | -0,29 | 0,69  |
| TPC         | 0,42  | 0,68  |
| DMLOSS      | -0,52 | 0,31  |
| OM          | 0,38  | 0,06  |
| CP          | -0,28 | 0,05  |
| aNDF        | 0,84  | 0,48  |
| ADF         | 0,89  | 0,18  |
| ADL         | 0,13  | 0,07  |
| Hemic       | 0,46  | 0,75  |
| Cell        | 0,88  | 0,13  |
| IVDMD       | -0,87 | 0,08  |
| IvdNDF      | 0,02  | 0,73  |
| IvNDFD      | -0,39 | 0,37  |
| IsdNDF      | 0,63  | -0,26 |
| IsNDFD      | 0,54  | -0,49 |
| IsdADF      | 0,56  | -0,57 |
| IsADFD      | 0,48  | -0,7  |

LAB: Lactic acid bacteria. TMB: Total mesophilic bacteria. DM: dry matter. OM: Organic matter. CP: crude protein. RSs: Reducing sugars. L:A: Lactic: acetic ratio. TPC: total phenolic compounds. DM: Dry matter. ADIN: Acid detergent insoluble nitrogen. aNDF: neutral detergent fiber, expressed inclusive of residual ash. ADF: acid detergent fiber. ADL: Acid detergent lignin. Cell: Cellulose. Hemic: Hemicellulose. IvdMD: *In vitro* dry matter true digestibility. Is/IvdNDF: *In situ/in vitro* digestible aNDF, respectively. Is/IvNDFD: *In situ/in vitro* aNDF digestibility, respectively. IsdADF: *In situ* digestible ADF. IsADFD: *In situ* ADF digestibility.
