# Supplementary material
Source: MDPI journal article supplement (https://www.mdpi.com/2311-5637/9/4/331)
Supplement: s1 [file s1]

**Supplementary Table S3.** Principal Component Analysis of silage-IvCS variables: Correlation-probability matrix.

|                                | F <sub>AE-37C</sub> | $\Delta$ pH <sub>12</sub> —CSM | $\Delta$ pH <sub>24</sub> —CSM | $\Delta$ pH <sub>48</sub> —CSM | $\Delta$ CFU <sub>48</sub> —CSM | RSs—CSM | F <sub>AE—pH4</sub> | F <sub>AE—pH5</sub> | F <sub>AE—pH6</sub> | F <sub>AE—18C</sub> |
|--------------------------------|---------------------|--------------------------------|--------------------------------|--------------------------------|---------------------------------|---------|---------------------|---------------------|---------------------|---------------------|
| pH                             | 0,7774              | 0,6591                         | 0,7315                         | 0,531                          | 0,5952                          | 0,7235  | 0,8229              | 0,79                | 0,836               | 0,8086              |
| LAB                            | 0,44                | 0,4657                         | 0,2888                         | 0,1467                         | 0,6498                          | 0,7805  | 0,4662              | 0,3334              | 0,3782              | 0,4935              |
| TMB                            | 0,7903              | 0,592                          | 0,65                           | 0,681                          | 0,301                           | 0,7128  | 0,7266              | 0,7146              | 0,6805              | 0,7475              |
| Yeast                          | 0,248               | 0,714                          | 0,9637                         | 0,7585                         | 0,9505                          | 0,6409  | 0,3356              | 0,1974              | 0,1983              | 0,3327              |
| RSs                            | 0,4437              | 0,0238                         | 0,0041                         | 0,0534                         | 0,0002                          | 0,0583  | 0,8561              | 0,6386              | 0,5471              | 0,5984              |
| N—NH <sub>3</sub>              | 0,2328              | 0,2906                         | 0,47                           | 0,5639                         | 0,2054                          | 0,7751  | 0,3207              | 0,257               | 0,2786              | 0,3135              |
| Lactate                        | 0,5165              | 0,7545                         | 0,6343                         | 0,6446                         | 0,8302                          | 0,3046  | 0,3809              | 0,5045              | 0,6221              | 0,4543              |
| Acetate                        | 0,4299              | 0,9948                         | 0,8777                         | 0,8802                         | 0,4856                          | 0,6976  | 0,221               | 0,4008              | 0,4492              | 0,3058              |
| L:A                            | 0,5896              | 0,9189                         | 0,9445                         | 0,8575                         | 0,2191                          | 0,9793  | 0,3683              | 0,5382              | 0,5385              | 0,4375              |
| Ethanol                        | 0,3138              | 0,5228                         | 0,4641                         | 0,5608                         | 0,7455                          | 0,5654  | 0,2965              | 0,3662              | 0,3465              | 0,2617              |
| Total acids                    | 0,6781              | 0,7649                         | 0,6673                         | 0,8184                         | 0,9702                          | 0,3003  | 0,4833              | 0,6653              | 0,7817              | 0,595               |
| TPC                            | 0,4673              | 0,0135                         | 0,0132                         | 0,0145                         | 0,0324                          | 0,1871  | 0,6939              | 0,6172              | 0,5492              | 0,5892              |
| DMloss                         | 0,2704              | 0,367                          | 0,4634                         | 0,9849                         | 0,3889                          | 0,355   | 0,4787              | 0,3016              | 0,2725              | 0,32                |
| OM                             | 0,2252              | 0,6738                         | 0,8766                         | 0,72                           | 0,9512                          | 0,4725  | 0,255               | 0,1818              | 0,174               | 0,3115              |
| CP                             | 0,7644              | 0,7594                         | 0,9563                         | 0,5272                         | 0,2939                          | 0,6702  | 0,6188              | 0,6377              | 0,5911              | 0,8415              |
| aNDF                           | 0,7217              | 0,4615                         | 0,5212                         | 0,695                          | 0,3112                          | 0,9678  | 0,7727              | 0,8038              | 0,8131              | 0,7318              |
| ADF                            | 0,7348              | 0,97                           | 0,8339                         | 0,6456                         | 0,7249                          | 0,665   | 0,726               | 0,7244              | 0,765               | 0,7502              |
| ADL                            | 0,5684              | 0,5815                         | 0,6667                         | 0,2334                         | 0,3236                          | 0,6574  | 0,7399              | 0,6035              | 0,6957              | 0,5902              |
| Hemicellulose                  | 0,7446              | 0,1229                         | 0,1222                         | 0,1575                         | 0,1503                          | 0,674   | 0,8299              | 0,901               | 0,8728              | 0,7464              |
| Cellulose                      | 0,9152              | 0,877                          | 0,9704                         | 0,9321                         | 0,9264                          | 0,8005  | 0,8654              | 0,898               | 0,9032              | 0,9284              |
| IvDMD                          | 0,9588              | 0,7104                         | 0,8443                         | 0,3697                         | 0,3151                          | 0,8202  | 0,7427              | 0,9018              | 0,8745              | 0,8973              |
| IvNDF                          | 0,6016              | 0,1346                         | 0,2722                         | 0,0815                         | 0,9327                          | 0,7924  | 0,4432              | 0,6368              | 0,6141              | 0,5538              |
| IvNDFD                         | 0,9507              | 0,3022                         | 0,4612                         | 0,0948                         | 0,4929                          | 0,717   | 0,7148              | 0,9311              | 0,8758              | 0,8957              |
| IsdNDF                         | 0,6764              | 0,855                          | 0,7672                         | 0,7004                         | 0,6969                          | 0,7352  | 0,7457              | 0,7083              | 0,7215              | 0,7111              |
| IsNDFD                         | 0,4445              | 0,5335                         | 0,5378                         | 0,4409                         | 0,5728                          | 0,6669  | 0,4831              | 0,4825              | 0,4951              | 0,4734              |
| IsdADF                         | 0,2316              | 0,8698                         | 0,9091                         | 0,9071                         | 0,7018                          | 0,5345  | 0,0977              | 0,2218              | 0,2866              | 0,1249              |
| IsADF                          | 0,1957              | 0,5267                         | 0,8013                         | 0,744                          | 0,8738                          | 0,6329  | 0,0785              | 0,1972              | 0,2505              | 0,1078              |
| ADIN                           | 0,9519              | 0,7839                         | 0,7647                         | 0,954                          | 0,7856                          | 0,7451  | 0,9675              | 0,9265              | 0,9904              | 0,963               |
| F <sub>AE—37C</sub>            |                     | 0,1151                         | 0,3022                         | 0,5631                         | 0,486                           | 0,3042  | 0,0003              | <0,0001             | <0,0001             | <0,0001             |
| $\Delta$ pH <sub>12</sub> —CSM |                     |                                | 0,0003                         | 0,0035                         | 0,0828                          | 0,0131  | 0,2682              | 0,1851              | 0,1234              | 0,1823              |
| $\Delta$ pH <sub>24</sub> —CSM |                     |                                |                                | 0,0018                         | 0,0245                          | 0,0037  | 0,6143              | 0,4475              | 0,3301              | 0,4321              |
| $\Delta$ pH <sub>48</sub> —CSM |                     |                                |                                |                                | 0,1803                          | 0,0235  | 0,7865              | 0,7005              | 0,5587              | 0,7032              |

|                   |  |  |  |  |  |        |        |         |         |         |
|-------------------|--|--|--|--|--|--------|--------|---------|---------|---------|
| <b>ΔCFU48—CSM</b> |  |  |  |  |  | 0,0864 | 0,9578 | 0,6804  | 0,5968  | 0,6661  |
| <b>RSs—CSM</b>    |  |  |  |  |  |        | 0,6717 | 0,411   | 0,2792  | 0,4792  |
| <b>FAE—pH4</b>    |  |  |  |  |  |        |        | <0,0001 | 0,0003  | <0,0001 |
| <b>FAE—pH5</b>    |  |  |  |  |  |        |        |         | <0,0001 | <0,0001 |
| <b>FAE—pH6</b>    |  |  |  |  |  |        |        |         |         | <0,0001 |
| <b>FAE—18C</b>    |  |  |  |  |  |        |        |         |         |         |

Significance levels of each correlation coefficients are presented. LAB: Lactic acid bacteria. TMB: Total mesophilic bacteria. DM: dry matter. OM: Organic matter. CP: crude protein. RSs: Reducing sugars. L:A: Lactate: acetate ratio. TPC: total phenolic compounds. DMloss: Dry matter loss. ADIN: Acid detergent insoluble nitrogen. aNDF: neutral detergent fiber, expressed inclusive of residual ash. ADF: acid detergent fiber. ADL: Acid detergent lignin. Cell: Cellulose. Hemic: Hemicellulose. IVDMD: *In vitro* dry matter true digestibility. Is/IvdNDF: *In situ/in vitro* digestible aNDF, respectively. Is/IvNDFD: *In situ/in vitro* aNDF digestibility, respectively. IsdADF: *In situ* digestible ADF. IsADFD: *In situ* ADF digestibility. FAE—37C: FAE quantification at 37 °C—pH 7.0. FAE—18C: FAE quantification at 18 °C—pH 7.0. FAE—pH4/5/6: FAE activity quantification at 37 °C—pH 4.0,5.0 or 6.0, respectively. ΔpH12/24/48—CSM: ΔpH at 12/24/48 h of incubation in Corn Stover Soluble Fraction Medium (CSM). ΔCFU48—CSM: ΔLog CFU mL<sup>-1</sup> at 48 h of incubation in CSM. RSs—CSM: Reducing sugars at 48 h of incubation in CSM.
