# Supplementary material
Source: MDPI journal article supplement (https://www.mdpi.com/2311-5637/9/4/331)
Supplement: s1 [file s1]

**Supplementary Table S1.** Principal Component Analysis of silage variables: correlation-probability matrix.

|             | pH      | LAB    | TMB    | Yeast  | RSs    | N-NH3   | Lactate | Acetate | L:A    | Ethanol | Total acids | TPC     | DMloss | OM     | CP     |
|-------------|---------|--------|--------|--------|--------|---------|---------|---------|--------|---------|-------------|---------|--------|--------|--------|
| pH          |         |        |        |        |        |         |         |         |        |         |             |         |        |        |        |
| LAB         | 0,64    |        |        |        |        |         |         |         |        |         |             |         |        |        |        |
| TMB         | 0,7856  | 0,7617 |        |        |        |         |         |         |        |         |             |         |        |        |        |
| Yeast       | 0,7612  | 0,0031 | 0,7822 |        |        |         |         |         |        |         |             |         |        |        |        |
| RSs         | 0,9504  | 0,2756 | 0,3076 | 0,7631 |        |         |         |         |        |         |             |         |        |        |        |
| N-NH3       | 0,4776  | 0,258  | 0,0624 | 0,1206 | 0,4029 |         |         |         |        |         |             |         |        |        |        |
| Lactate     | 0,0766  | 0,8533 | 0,4761 | 0,7254 | 0,9085 | 0,1502  |         |         |        |         |             |         |        |        |        |
| Acetate     | 0,9228  | 0,5777 | 0,6297 | 0,9428 | 0,5226 | 0,4253  | 0,3332  |         |        |         |             |         |        |        |        |
| L:A         | 0,3254  | 0,7029 | 0,247  | 0,8786 | 0,3506 | 0,8903  | 0,8095  | 0,0034  |        |         |             |         |        |        |        |
| Ethanol     | 0,3599  | 0,1677 | 0,2334 | 0,0804 | 0,5338 | 0,3375  | 0,5123  | 0,8343  | 0,8836 |         |             |         |        |        |        |
| Total acids | 0,1651  | 0,9075 | 0,5318 | 0,6548 | 0,936  | 0,1386  | 0,0001  | 0,0826  | 0,6863 | 0,6294  |             |         |        |        |        |
| TPC         | >0,9999 | 0,1134 | 0,1512 | 0,6082 | 0,0042 | 0,3899  | 0,6561  | 0,3352  | 0,1756 | 0,5199  | 0,8431      |         |        |        |        |
| DMloss      | 0,6645  | 0,6478 | 0,7942 | 0,2388 | 0,3998 | 0,9476  | 0,2249  | 0,0957  | 0,3822 | 0,8603  | 0,0544      | 0,6328  |        |        |        |
| OM          | 0,9497  | 0,5544 | 0,5638 | 0,7506 | 0,6529 | 0,4565  | 0,8993  | 0,0531  | 0,0872 | 0,3478  | 0,6373      | 0,2609  | 0,5427 |        |        |
| CP          | 0,8053  | 0,7067 | 0,5316 | 0,9738 | 0,773  | 0,5126  | 0,7323  | 0,1627  | 0,2927 | 0,6632  | 0,5169      | 0,4735  | 0,885  | 0,0056 |        |
| aNDF        | 0,1494  | 0,3771 | 0,0786 | 0,5914 | 0,3117 | 0,5426  | 0,4795  | 0,2455  | 0,0717 | 0,4925  | 0,787       | 0,1076  | 0,4234 | 0,642  | 0,8046 |
| ADF         | 0,049   | 0,948  | 0,3112 | 0,9407 | 0,8537 | 0,7298  | 0,4742  | 0,1361  | 0,0279 | 0,6059  | 0,9037      | 0,4524  | 0,3898 | 0,348  | 0,4346 |
| ADL         | 0,2349  | 0,3492 | 0,7567 | 0,6936 | 0,5221 | 0,4392  | 0,1416  | 0,8359  | 0,3857 | 0,968   | 0,3701      | >0,9999 | 0,6049 | 0,7552 | 0,3328 |
| Hemic       | 0,6974  | 0,0728 | 0,0383 | 0,3368 | 0,0614 | 0,4227  | 0,5745  | 0,7284  | 0,4556 | 0,4817  | 0,6301      | 0,0151  | 0,7317 | 0,8841 | 0,7265 |
| Cell        | 0,1526  | 0,7171 | 0,34   | 0,8523 | 0,9578 | 0,938   | 0,8349  | 0,1199  | 0,0565 | 0,646   | 0,8032      | 0,4341  | 0,4174 | 0,3925 | 0,2851 |
| IvDMD       | 0,0586  | 0,8746 | 0,4077 | 0,9419 | 0,566  | 0,9479  | 0,7489  | 0,0802  | 0,0173 | 0,7977  | 0,7502      | 0,7065  | 0,1847 | 0,5794 | 0,8787 |
| IvDNDf      | 0,7347  | 0,1481 | 0,2706 | 0,5509 | 0,5479 | 0,4681  | 0,6304  | 0,6306  | 0,7491 | 0,5613  | 0,4663      | 0,0992  | 0,6146 | 0,9591 | 0,5663 |
| IvNDFD      | 0,1546  | 0,2503 | 0,9588 | 0,6704 | 0,8977 | >0,9999 | 0,7136  | 0,3991  | 0,2275 | 0,87    | 0,8833      | 0,5024  | 0,3393 | 0,8706 | 0,4015 |
| IsdNDF      | 0,5594  | 0,9262 | 0,4696 | 0,8442 | 0,4973 | 0,7934  | 0,3841  | 0,4045  | 0,56   | 0,7368  | 0,3241      | 0,6955  | 0,3379 | 0,5648 | 0,975  |
| IsNDFD      | 0,6399  | 0,7416 | 0,7621 | 0,8295 | 0,3229 | 0,51    | 0,221   | 0,4003  | 0,6547 | 0,6002  | 0,189       | 0,3364  | 0,3527 | 0,4738 | 0,862  |
| IsdADF      | 0,8342  | 0,7178 | 0,6626 | 0,5626 | 0,9135 | 0,8551  | 0,1301  | 0,0948  | 0,1335 | 0,2127  | 0,1012      | >0,9999 | 0,5354 | 0,8905 | 0,5763 |
| IsADF       | 0,7106  | 0,6394 | 0,7947 | 0,733  | 0,8651 | 0,463   | 0,1397  | 0,0966  | 0,1607 | 0,3989  | 0,091       | 0,6469  | 0,6031 | 0,6986 | 0,56   |
| ADIN        | 0,8553  | 0,2193 | 0,6376 | 0,3587 | 0,9497 | 0,051   | 0,1737  | 0,0909  | 0,4707 | 0,2459  | 0,0668      | 0,7807  | 0,1287 | 0,347  | 0,4008 |

**Supplementary Table S1 (cont.).** Principal Component Analysis of silage variables: correlation-probability matrix.

|             | aNDF   | ADF    | ADL    | Hemic  | Cell   | IvDMD  | IvdNDF | IvNDFD | IsdNDF | IsNDFD | IsdADF | IsADFD |
|-------------|--------|--------|--------|--------|--------|--------|--------|--------|--------|--------|--------|--------|
| pH          |        |        |        |        |        |        |        |        |        |        |        |        |
| LB          |        |        |        |        |        |        |        |        |        |        |        |        |
| TMB         |        |        |        |        |        |        |        |        |        |        |        |        |
| Yeast       |        |        |        |        |        |        |        |        |        |        |        |        |
| RSs         |        |        |        |        |        |        |        |        |        |        |        |        |
| N-NH3       |        |        |        |        |        |        |        |        |        |        |        |        |
| Lactate     |        |        |        |        |        |        |        |        |        |        |        |        |
| Acetate     |        |        |        |        |        |        |        |        |        |        |        |        |
| L:A         |        |        |        |        |        |        |        |        |        |        |        |        |
| Ethanol     |        |        |        |        |        |        |        |        |        |        |        |        |
| Total acids |        |        |        |        |        |        |        |        |        |        |        |        |
| TPC         |        |        |        |        |        |        |        |        |        |        |        |        |
| DMloss      |        |        |        |        |        |        |        |        |        |        |        |        |
| OM          |        |        |        |        |        |        |        |        |        |        |        |        |
| CP          |        |        |        |        |        |        |        |        |        |        |        |        |
| aNDF        |        |        |        |        |        |        |        |        |        |        |        |        |
| ADF         | 0,0017 |        |        |        |        |        |        |        |        |        |        |        |
| ADL         | 0,8645 | 0,6615 |        |        |        |        |        |        |        |        |        |        |
| Hemic       | 0,01   | 0,2589 | 0,7963 |        |        |        |        |        |        |        |        |        |
| Cell        | 0,0021 | 0,0001 | 0,7621 | 0,2115 |        |        |        |        |        |        |        |        |
| IvDMD       | 0,0335 | 0,0067 | 0,1601 | 0,4761 | 0,0369 |        |        |        |        |        |        |        |
| IvdNDF      | 0,2373 | 0,7219 | 0,1087 | 0,0309 | 0,4516 | 0,3919 |        |        |        |        |        |        |
| IvNDFD      | 0,7716 | 0,3789 | 0,0064 | 0,5064 | 0,7716 | 0,0181 | 0,0075 |        |        |        |        |        |
| IsdNDF      | 0,1013 | 0,07   | 0,3414 | 0,4806 | 0,0194 | 0,1673 | 0,7155 | 0,8771 |        |        |        |        |
| IsNDFD      | 0,3066 | 0,1742 | 0,4343 | 0,9024 | 0,0831 | 0,1702 | 0,7669 | 0,5941 | 0,0001 |        |        |        |
| IsdADF      | 0,7039 | 0,461  | 0,6199 | 0,7819 | 0,327  | 0,2735 | 0,4228 | 0,5104 | 0,1982 | 0,1208 |        |        |
| IsADFD      | 0,9904 | 0,5637 | 0,8815 | 0,3849 | 0,4837 | 0,2358 | 0,1247 | 0,2542 | 0,3486 | 0,1641 | 0,0001 |        |
| ADIN        | 0,2282 | 0,2274 | 0,4241 | 0,5025 | 0,1114 | 0,2767 | 0,8198 | 0,9714 | 0,097  | 0,1094 | 0,6413 | 0,5723 |

Significance levels of each correlation coefficients are presented. LAB: Lactic acid bacteria. TMB: Total mesophilic bacteria. DM: dry matter. OM: Organic matter. CP: crude protein. RSs: Reducing sugars. L:A: Lactate: acetate ratio. TPC: total phenolic compounds. DMloss: Dry matter loss. ADIN: Acid detergent insoluble nitrogen. aNDF: neutral detergent fiber, expressed inclusive of residual ash. ADF: acid detergent fiber. ADL: Acid detergent lignin. Cell: Cellulose. Hemic: Hemicellulose. IvDMD: *In vitro* dry matter true digestibility. Is/IvdNDF: *In situ/in vitro* digestible aNDF, respectively. Is/IvNDFD: *In situ/in vitro* aNDF digestibility, respectively. IsdADF: *In situ* digestible ADF. IsADFD: *In situ* ADF digestibility.
