# Supplementary material
Source: MDPI journal article supplement (https://www.mdpi.com/2311-5637/9/4/331)
Supplement: s1 [file s1]

**Supplementary Table S4.** Principal Component Analysis of silage-IvCS variables: correlations between the Principal Components and the original variables.

| Variables         | CP 1  | CP 2   |
|-------------------|-------|--------|
| pH                | 0,01  | -0,43  |
| LAB               | -0,18 | -0,004 |
| TMB               | -0,11 | 0,7    |
| Yeast             | 0,09  | -0,18  |
| RSs               | 0,61  | -0,47  |
| N-NH <sub>3</sub> | -0,56 | 0,48   |
| Lactate           | -0,39 | -0,03  |
| Acetate           | -0,48 | -0,69  |
| L:A               | 0,23  | 0,79   |
| Ethanol           | -0,49 | -0,18  |
| Total acids       | -0,39 | -0,14  |
| TPC               | -0,71 | 0,46   |
| DMloss            | 0,09  | -0,49  |
| OM                | -0,41 | -0,37  |
| CP                | 0,1   | 0,27   |
| aNDF              | -0,21 | 0,85   |
| ADF               | 0,04  | 0,76   |
| ADL               | -0,07 | 0,13   |
| Hemic             | -0,47 | 0,62   |
| Cell              | 0,09  | 0,75   |
| IVDMD             | -0,27 | -0,79  |
| IVDNDF            | -0,58 | 0,13   |
| IVNDFD            | -0,37 | -0,32  |
| IsdNDF            | 0,4   | 0,63   |
| IsNDFD            | 0,61  | 0,53   |
| IsdADF            | 0,56  | 0,53   |
| IsADFD            | 0,68  | 0,35   |
| ADIN              | -0,22 | -0,28  |
| FAE-37C           | 0,82  | -0,03  |
| ΔpH12-CSM         | -0,8  | 0,32   |
| ΔpH24-CSM         | -0,68 | 0,36   |
| ΔpH48-CSM         | -0,63 | 0,17   |
| ΔCFU48-CSM        | -0,47 | 0,61   |
| RSs-CSM           | 0,5   | -0,22  |
| FAE-pH4           | 0,76  | 0,13   |
| FAE-pH5           | 0,77  | 0,03   |
| FAE-pH6           | 0,78  | 0,01   |
| FAE-18C           | 0,79  | 0,04   |

Significance levels of each correlation coefficients are presented. LAB: Lactic acid bacteria. TMB: Total mesophilic bacteria. DM: dry matter. OM: Organic matter. CP: crude protein. RSs: Reducing sugars. L:A: Lactate: acetate ratio. TPC: total phenolic compounds. DMloss: Dry matter loss. ADIN: Acid detergent insoluble nitrogen. aNDF: neutral detergent fiber, expressed inclusive of residual ash. ADF: acid detergent fiber. ADL: Acid detergent lignin. Cell: Cellulose. Hemic: Hemicellulose. IVDMD: *In vitro* dry matter true digestibility. Is/IvdNDF: *In situ/in vitro* digestible aNDF, respectively. Is/IvNDFD: *In situ/in vitro* aNDF digestibility, respectively. IsdADF: *In situ* digestible ADF. IsADFD: *In situ* ADF digestibility. FAE-37C: FAE quantification at 37 °C-pH 7.0. FAE-18C: FAE quantification at 18 °C-pH 7.0. FAE-pH4/5/6: FAE activity

quantification at 37 °C-pH 4.0,5.0 or 6.0, respectively.  $\Delta\text{pH}_{12/24/48}\text{-CSM}$ :  $\Delta\text{pH}$  at 12/24/48 h of incubation in Corn Stover Soluble Fraction Medium (CSM).  $\Delta\text{CFU}_{48}\text{-CSM}$ :  $\Delta\text{Log CFU mL}^{-1}$  at 48 h of incubation in CSM. RSs-CSM: Reducing sugars at 48 h of incubation in CSM.
